# Supplementary material
Source: Springer Nature journal article supplement (https://www.springermedizin.de/resource/supplementary/12874_2013_955_MOESM8_ESM.pdf/9433212)

Detrended raw series vs GARCH predictions, 3SE CL

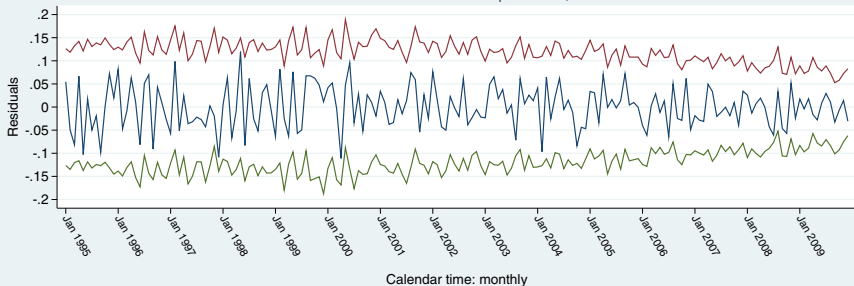

Detrended expected series vs one-setp ARMA predictions, 3SE CL

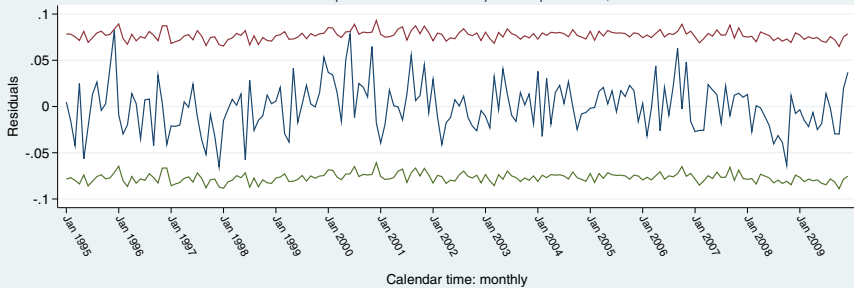

Supplement: MOESM8 [file 9433212]
